# Supplementary material
Source: PubMed Central journal article supplement (PMC8034498)
Supplement: NIHMS1677944-supplement-Supplementary_Figures_1-3_plus_Table.pdf [file NIHMS1677944-supplement-Supplementary_Figures_1-3_plus_Table.pdf]

# Polar Density Plots of Pixel Coordinate Error

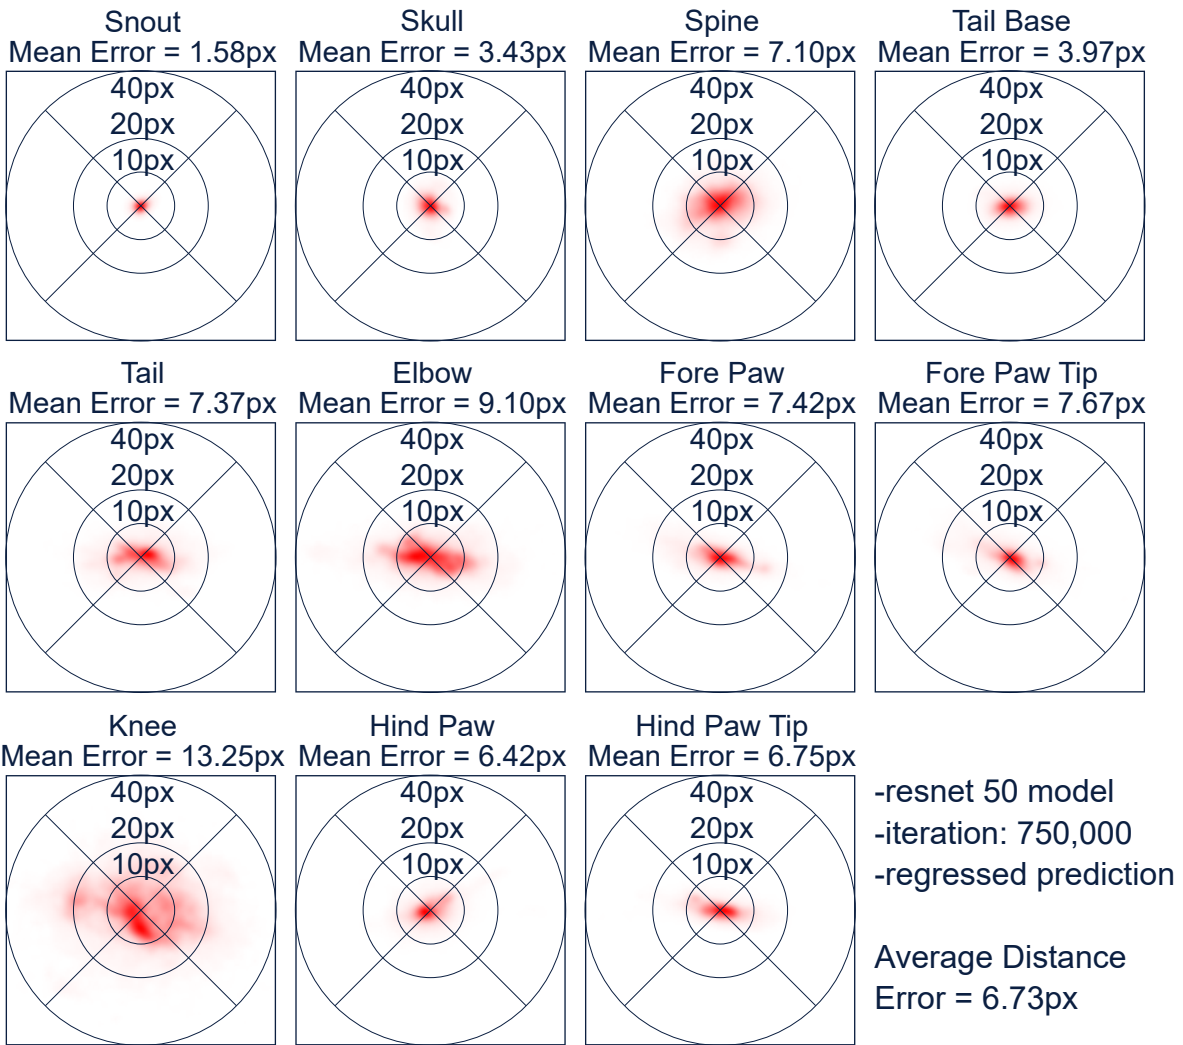

**Supplementary Fig. 1** Polar plots showing mean errors for different body parts between a synthetically trained DeepLabCut (DLC) project and a model trained on 1280 manually labelled frames over the course of 27,000 frames.

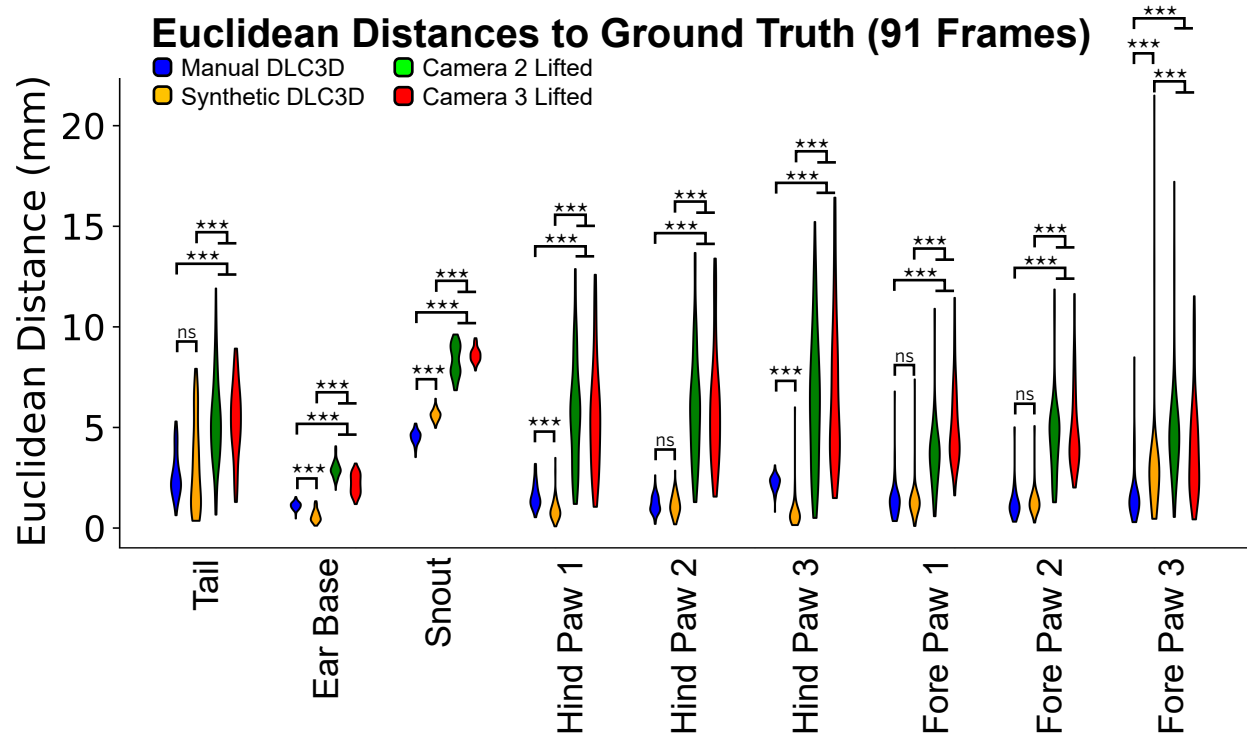

**Supplementary Fig. 2** Violin plots of Euclidean distances between 3D pose estimators to ground-truth of a 91 frame long sequence. Results show similar performance between a synthetically trained and real-video trained (208 manually labelled frames) DLC 3D project, while single camera pose estimation models show a significantly larger error but in the realm of 5 to 7mm (one-way ANOVA, Dunn's Multiple Comparison Test, \*\*\* denote  $p < 0.001$ ).

## Euclidean Distances to Synthetic DLC-3D (3172 Frames)

■ Manual DLC-3D (regressed)    
 ■ Camera 2 Lifted    
 ■ Camera 3 Lifted

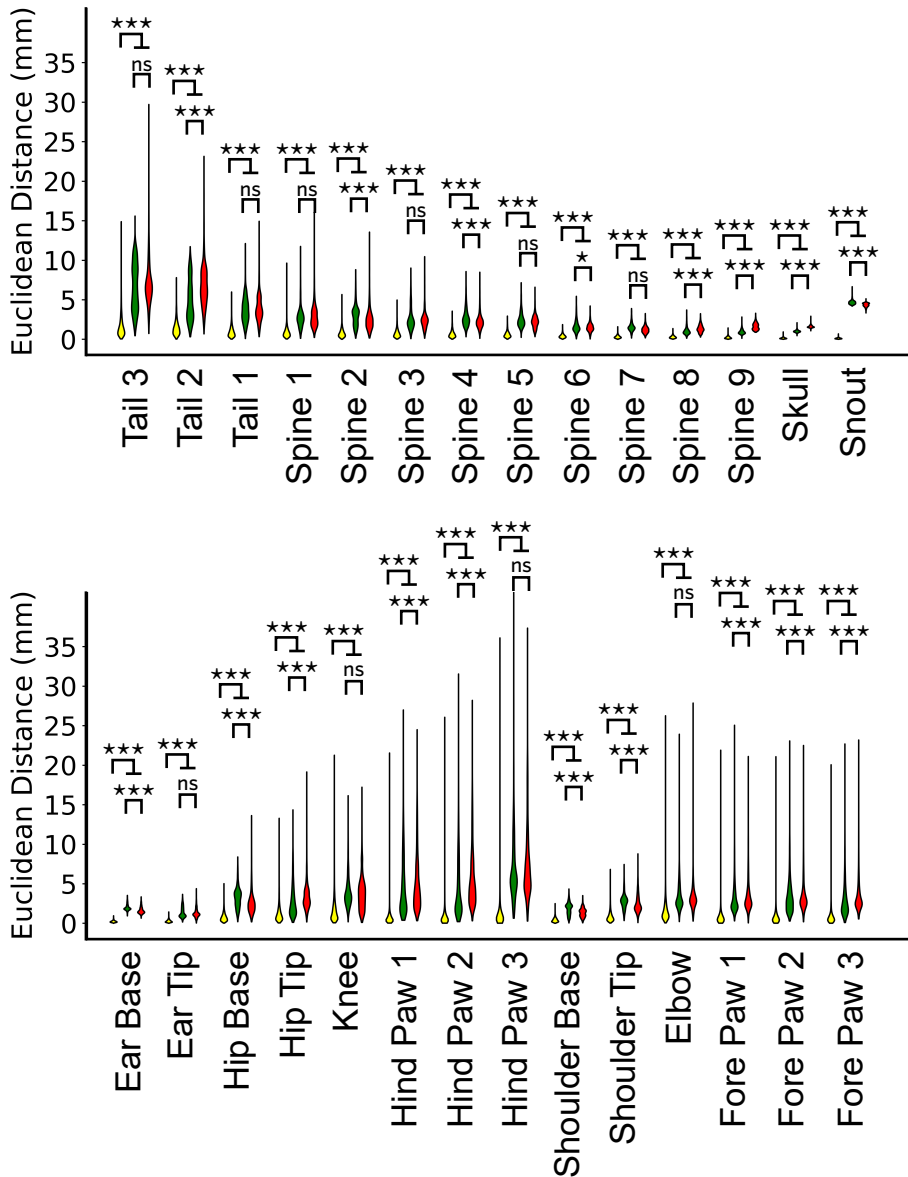

**Supplementary Fig. 3** Euclidean distances to the synthetically trained DLC 3D project to test single camera 2D to 3D pose recovery show an RMSE of 3.97 and 4.17 mm for camera 2 and camera 3 respectively (one-way ANOVA, Dunn's Multiple Comparison Test, \*\*\* denote  $p < 0.001$ ).

| Experiment                 | Key Animations                                                | Key Animation Length (frames) | Looped Length (frames) | Total Animation Length (frames) | Noise Objects                                                                  | U-GAT-IT Pytorch trainA set size (# of images)                   | U-GAT-IT Pytorch trainB set size (# of images)                    | U-GAT-IT (PyTorch) Parameters - Trained on GTX 1070                                                                                               |
|----------------------------|---------------------------------------------------------------|-------------------------------|------------------------|---------------------------------|--------------------------------------------------------------------------------|------------------------------------------------------------------|-------------------------------------------------------------------|---------------------------------------------------------------------------------------------------------------------------------------------------|
| <b>Mouse Running Wheel</b> | various poses (grooming, resting, running)                    | 20                            | 500                    | 1000                            | Bone position & rotatations (paws, digits, knee, skull, hips, shoulders, tail) | 1000                                                             | mGT1: 3511<br>mGT2: 2945<br>mLD1: 576<br>mLD2: 3158<br>mLD3: 3905 | --light False --img_size 320 --batch_size 1 --ch 24 --n_res 3 --n_dis 5 --adv_weight 1 --cycle_weight 256 --identity_weight 128 --cam_weight 512  |
|                            | running animation loop                                        | 28                            | 500                    |                                 | Camera1 position and rotations                                                 |                                                                  |                                                                   |                                                                                                                                                   |
| <b>Pellet Reaching</b>     | successful reach                                              | 50                            | 1000                   | 1000                            | Bone position & rotatations (paws, digits, elbow)                              | 3000 (1000 for each camera - forward, lateral, and interpolated) | 9729                                                              | --light False --img_size 320 --batch_size 1 --ch 24 --n_res 3 --n_dis 5 --adv_weight 1 --cycle_weight 1024 --identity_weight 512 --cam_weight 512 |
|                            |                                                               |                               |                        |                                 | Camera rotation                                                                |                                                                  |                                                                   |                                                                                                                                                   |
|                            |                                                               |                               |                        |                                 | Lighting intensity                                                             |                                                                  |                                                                   |                                                                                                                                                   |
| <b>Openfield</b>           | various poses (walking, grooming, turning, reaching up, etc.) | 10                            | 2000                   | 2000                            | Bone position & rotatations (paws, digits, knee, skull, hips, shoulders, tail) | 2000                                                             | 2677                                                              | --light False --img_size 320 --batch_size 1 --ch 24 --n_res 3 --n_dis 5 --adv_weight 1 --cycle_weight 1024 --identity_weight 512 --cam_weight 512 |

**Supplementary Table 1** Primary animations done for each dataset and their final animation length with noise objects, and parameters used during U-GAT-IT training.
